# Supplementary material
Source: PubMed Central journal article supplement (PMC2790862)
Supplement: NIHMS156483-supplement-supplementary_table.pdf [file NIHMS156483-supplement-supplementary_table.pdf]

## Supplementary Table 1: Real-time PCR primer sets for mouse genes

| Genes          | Forward                  | Reverse              | Size  | Tm  |
|----------------|--------------------------|----------------------|-------|-----|
| IL4            | catgggaaaactccatgctt     | atcgaaaagcccgaagagt  | 76bp  | 60C |
| IL10           | ccaggagatccttfgatga      | aactggccacagtttcagg  | 96bp  | 60C |
| IL17A          | ttcagggtcgagaagatgct     | aaacgtgggggttcttagg  | 112bp | 60C |
| IL-17F (1)     | caaaaccaggggcatttctgt    | ggggtctcgagtgatgttgt | 81bp  | 60C |
| IL-17F (2)     | ccccatgggattacaacatc     | atgggtctgtcttctgacc  | 115bp | 60C |
| IFN- $\gamma$  | tcaagtggcatagatgtggaagaa | tggctctgcaggatttcatg | 92bp  | 50C |
| ROR $\gamma$ t | ccgctgagagggttcac        | tgagaacttggtccctgtc  | 88bp  | 60C |
| 18S RNA        | ccgcagctaggaataatgga     | ccctcttaatcatggcctca | 76bp  | 60C |
| GAPDH          | accagaagactgtggatgg      | ggatgcagggatgatgttct | 81bp  | 60C |
| Hsp90ab1       | aaggctgaggcagacaaaaa     | accagaggagagcagagcag | 81bp  | 60C |
